# Supplementary material
Source: Elsevier journal article supplement (https://www.sciencedirect.com/science/article/pii/S0210570520302193)
Supplement: mmc1 [file S0210570520302193:mmc1.doc]

| **Anexo 1. ENCUESTA TELEFÓNICA a realizar durante la Citación en la Unidad de Motilidad** | | | |
| --- | --- | --- | --- |
| **SÍNTOMAS** | | | |
| ¿Durante los últimos 14 días ha padecido? | | SI | NO |
|  | Tos seca durante más de 24 horas. | □ | □ |
|  | Dificultad para respirar (sentir que le falta el aire). | □ | □ |
|  | Fiebre (>37,2ºC). | □ | □ |
|  | Dolor de garganta. | □ | □ |
|  | Dolor muscular. | □ | □ |
|  | Escalofríos. | □ | □ |
|  | Dolor de cabeza de reciente aparición o más intenso del habitual. | □ | □ |
| 1. **P** | Pérdida reciente del olfato o el gusto. | □ | □ |
| **Si presenta cualquiera de los síntomas descritos se suspenderá la cita y se reprogramará la prueba** (4-6 semanas después del inicio de los síntomas)**.**  **Proporcionar teléfono de cada Comunidad Autónoma para pacientes con sospecha de COVID-19**  Fuentes: <https://espanol.cdc.gov/coronavirus/2019-ncov/symptoms-testing/symptoms.html>  <http://coronavirusautotest.san.gva.es/autotest_va.html> | | | |
| **SI NO HA PRESENTADO SINTOMATOLOGÍA CARACTERÍSTICA DURANTE LOS 14 DÍAS PREVIOS, INTERROGAR SOBRE:** | | | |
| ANTECEDENTES DE HABER PADECIDO COVID-19 | | | |
| - Si tiene antecedente de COVID-19 confirmada mediante test microbiológico: - Si NO ha cumplido la cuarentena*: DEMORAR LA PRUEBA (aunque tenga PCR -) - Si ha cumplido la cuarentena* y tiene PCR –, o no se ha realizado PCR de comprobación de curación: REALIZAR LA PRUEBA. - Si ha cumplido la cuarentena*, pero tiene PCR + de comprobación: DEMORAR LA PRUEBA.   *4 semanas desde el inicio de los síntomas (6 en casos graves) | | | |
| - Si ha tenido clínica compatible con COVID-19, NO confirmada mediante test microbiológicos:   Fecha de inicio de síntomas: Fecha de finalización de síntomas:   - Más de 4 semanas desde el inicio de los síntomas: REALIZAR LA PRUEBA - Menos de 4 semanas desde el inicio de los síntomas: DEMORAR LA PRUEBA | | | |
| ANTECEDENTES DE CONTACTO ESTRECHO CON PACIENTE CON COVID-19 | | | |
| Fecha del contacto:   - Más de 2 semanas desde el contacto: REALIZAR LA PRUEBA - Menos de 2 semanas desde el contacto: DEMORAR LA PRUEBA | | | |

PCR: Test de reacción en cadena de la polimerasa.

| **Anexo 2: LISTA DE VERIFICACIÓNPREVIA A LA REALIZACIÓN DE LA PRUEBA**  **(marcar con una “X” conforme se vayan realizando los pasos en el siguiente orden)** | | |
| --- | --- | --- |
|  | Confirmar higiene de manos del paciente y del acompañante con solución hidroalcohólica | □ |
|  | Confirmar que paciente y acompañante llevan puesta una mascarilla facial (en caso contrario suministrar mascarilla quirúrgica) y guardan la distancia de seguridad. | □ |
|  | Encuesta de síntomas del paciente | □ |
|  | Toma de temperatura del paciente. En caso de Tº ≥ 37,2 ºC suspender prueba y reprogramar cita. | □ |

| **Anexo 3: Equipo y medidas de protección recomendados en la U. de Motilidad Digestiva** | |
| --- | --- |
| **Sala de espera** | **Para el paciente y acompañante** |
|  | Uso de solución hidroalcohólica a la entrada y a la salida de la unidad de Motilidad  Mascarilla facial quirúrgica  Guantes (opcional)  Distancia de al menos 1.5 metros  No uso de revistas ni objetos que puedan actuar como fómites  Temperatura <37.2ºC |
| **Durante el procedimiento** | **Para el personal que realiza la prueba** |
|  | Lavado de manos  Soluciones desinfectantes  Pijama  Calzado hospitalario  Mascarilla FFP2 / N95 o FFP3  Gafas protectoras con cierre lateral  Pantalla facial  Doble guante  Calzas o polainas (opcional)  Bata impermeable  Delantal de plástico  Ajustar la altura de la camilla para no situarse frente al paciente |

| **Anexo 4: VERIFICACIÓN DE EQUIPOS DE PROTECCIÓN INDIVIDUAL DURANTE LA PRUEBA**  **(marcar con una “X” conforme se vayan realizando los pasos en el siguiente orden)** | |
| --- | --- |
| - Procedimientos de motilidad sobre el tramo digestivo superior | EPI de protección biológica con protección frente a aerosoles y salpicaduras   - mascarilla FFP2-3 o N95 - guantes de nitrilo - bata impermeable - gafas protectoras o pantalla facial, - 2º par de guantes de nitrilo sobre la bata impermeable |
| - Exploraciones anorrectales con maniobra defecatoria | EPI de protección biológica con protección frente a aerosoles y salpicaduras   - mascarilla FFP2-3 o N95 - guantes de nitrilo - bata impermeable - gafas protectoras o pantalla facial, - 2º par de guantes de nitrilo sobre la bata impermeable |
| - Exploraciones anorrectales sin maniobra defecatoria | EPI de protección biológica   - mascarilla quirúrgica (explorador y paciente) - guantes de nitrilo - bata (no necesariamente impermeable) - protección ocular opcional - 2º par de guantes de nitrilo |
| Es útil seguir la guía visual proporcionada por la Organización Mundial de la Salud (OMS): <https://www.who.int/csr/resources/publications/ebola/ppe-steps/es/>  EPI: Equipo de Protección Individual. | |

| **Anexo 5: LISTA DE VERIFICACIÓN POST-INTERVENCIÓN**  **(marcar con una “X” conforme se vayan realizando los pasos en el siguiente orden)** | | |
| --- | --- | --- |
|  | Retirar y desechar EPI en la misma sala donde se realice el procedimiento. | □ |
| Es útil seguir una guía visual durante la retirada de los distintos elementos como la proporcionada por la OMS: <https://www.who.int/csr/resources/publications/ebola/ppe-steps/es/> | | |
|  | Desechar los materiales de un solo uso empleados a un contenedor para restos biológicos considerados infecciosos (Categoría B, UN 3291). | □ |
|  | Desconectar la sonda de pH/Impedanciometría del registrador antes de retirarla, para facilitar su desechado rápido a una bolsa de plástico. | □ |
|  | Comprobación en Sistemas de perfusión: no cerrar la perfusión hasta que se ha extraído el catéter del paciente. | □ |
|  | Desinfección con viricida de camilla, barandilla, y otros elementos con los que haya tenido contacto el paciente o el explorador. | □ |
|  | Registrador de pH-metría o pH-Impedanciometría, funda y correa de sujeción: colocar en recipiente y desinfectar con alcohol al 70%, antes de realizar el volcado de datos. | □ |
|  | Desinfección del resto de dispositivos según protocolo habitual de la Unidad de Motilidad. | □ |
